# Supplementary material for: The Impact of Five-tone Music Therapy Combined with Compound Essential Oil Acupoint Massage on Postoperative Negative Emotions and Sleep Quality in Patients with Lumbar Disc Herniation
Source: Research Square preprint supplement (doi:10.21203/rs.3.rs-5660880/v1), 2024-12-23
Supplement: Supplementary file 2 [file fcfb8360d22849c91524ffd5.docx]

**The 1st affiliated hospital, Jiangxi Medical College, Nanchang University Ethics Committee Review Opinion Letter**

Review Opinion No.: IIT [2024] Linlun Review No. 023

| **Project name** | The Impact of Five-tone Music Therapy Combined with Compound Essential Oil Acupoint Massage on Postoperative Negative Emotions and Sleep Quality in Patients with Lumbar Disc Herniation | | |
| --- | --- | --- | --- |
| **Sponsor/host unit** | The 1st affiliated hospital, Jiangxi Medical College, Nanchang University | | |
| **Research categories** | Research initiated by researchers | | |
| **Specialized group** | GCP Center | **Principle investigator** | Qinci Liu |
| **Review time** | January12,2024 | **Locations reviewed** | / |
| **Form of examination** | Quick review | **Review categories** | Initial review |
| **Review of documents** | | | |
| Research program (Version number: V1.0; Version date: December 19, 2023); Informed consent (Version No. : 1.0; Version date: December 19, 2023); Principal investigator history and research division team | | | |
| **Comments on review** | 1. Approval  2. The frequency of follow-up review is 12 months. Please submit the application for follow-up review one month before January 12, 2025 | | |
| **Matters needing attention** | 1. Prerequisite for study implementation: All studies should be conducted in accordance with the basic principles of Helsinki Declaration Palace and CCP. Such as projects involving the protection of human genetic resources. After obtaining the approval/filing from the Office of Human Genetic Resources of China, the approval/filing success document shall be submitted to the Administrative Committee before implementation.  2. Researchers are requested to carry out clinical research in strict accordance with the approved documents.  3. Any modification of the study protocol and the letter of Intent should be submitted to the Ethics committee for review before implementation. Please REFER TO THE COMMITTEE OF THE FIRST AFFILIATED HOSPITAL OF NANCHANG UNIVERSITY FOR SAFETY INFORMATION.  5. Protocol violation/alienation should be reported to the Ethics committee in time.  According to the advice of the Committee. Whether the trial starts or not. Please submit your application one month in advance.  7. Please timely inform the Ethics committee of the suspension/termination of the clinical study.  8. At the end of the study, the final report should be submitted to the ethics committee.  9. This approval shall be valid for one year. If it is not implemented within the time limit, it shall be annulled by itself. | | |
| Chairman of committee:Chunwen Tan  Date：January12,2024  The 1st affiliated hospital, Jiangxi Medical College, Nanchang University Ethics Committee | | | |
| Statement: This Council is formed and works in strict accordance with the GCP, ICH-GCP and relevant regulations  Add: No.17 Yongwai Zheng Street, Nanchang City  Contact: Zhan Shu  Tel & Fax :0791-88692201 | | | |
